# Supplementary material for: Dioxindole in asymmetric catalytic synthesis: direct access to 3-substituted 3-hydroxy-2-oxindoles via 1,4-additions to nitroalkenes
Source: Royal Society of Chemistry journal article supplement (doi:10.1039/c2cc30198a), 2012-01-01
Supplement: c2cc30198a.pdf [file c2cc30198a.pdf]

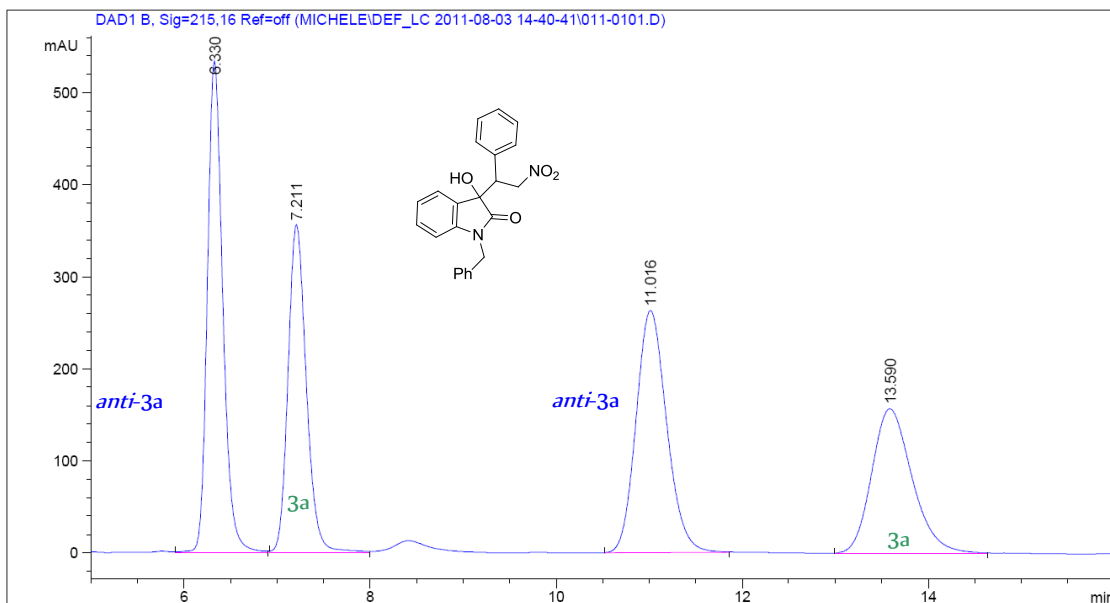

| Peak # | RetTime [min] | Type | Width [min] | Area [mAU*s] | Height [mAU] | Area %  |
|--------|---------------|------|-------------|--------------|--------------|---------|
| 1      | 6.330         | VB   | 0.1757      | 6116.51123   | 533.62970    | 28.1882 |
| 2      | 7.211         | BB   | 0.2087      | 4840.26514   | 355.77402    | 22.3066 |
| 3      | 11.016        | BB   | 0.3529      | 6014.67432   | 262.94470    | 27.7189 |
| 4      | 13.590        | BB   | 0.4655      | 4727.36523   | 156.90019    | 21.7863 |

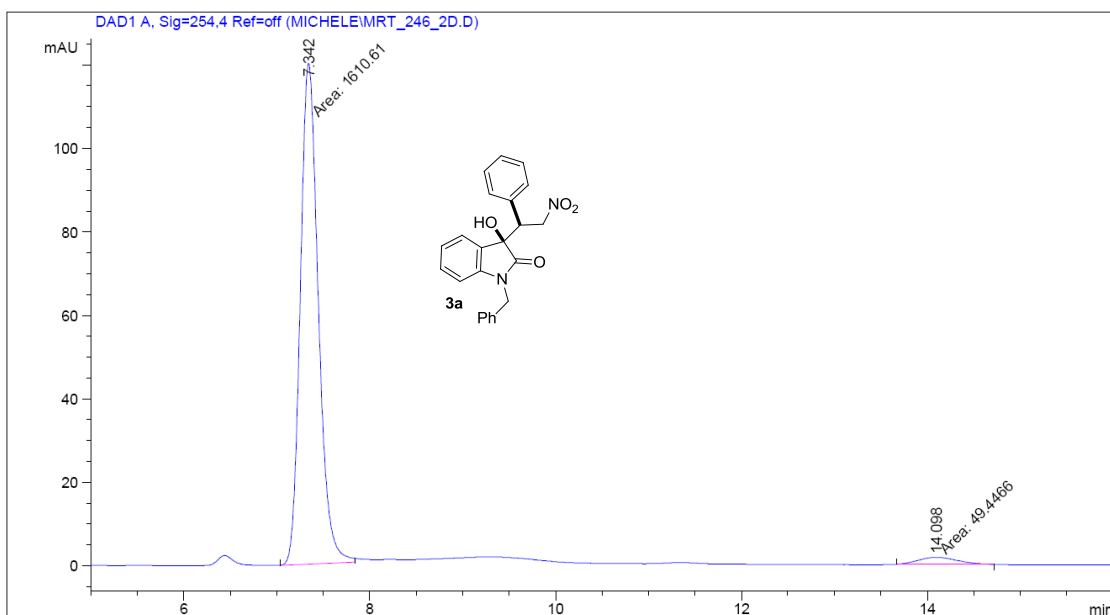

| Peak # | RetTime [min] | Type | Width [min] | Area [mAU*s] | Height [mAU] | Area %  |
|--------|---------------|------|-------------|--------------|--------------|---------|
| 1      | 7.342         | MM   | 0.2238      | 1610.61230   | 119.95962    | 97.0214 |
| 2      | 14.098        | MM   | 0.4869      | 49.44662     | 1.69249      | 2.9786  |

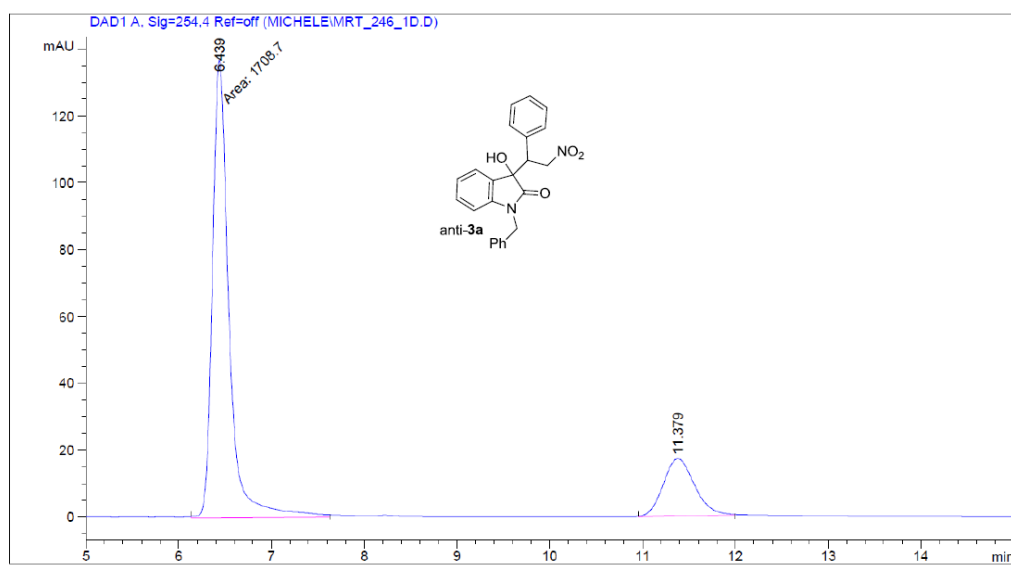

| Peak # | RetTime [min] | Type | Width [min] | Area [mAU*s] | Height [mAU] | Area %  |
|--------|---------------|------|-------------|--------------|--------------|---------|
| 1      | 6.439         | MM   | 0.2078      | 1708.70081   | 137.04002    | 81.0502 |
| 2      | 11.379        | BB   | 0.3604      | 399.49887    | 17.10897     | 18.9498 |

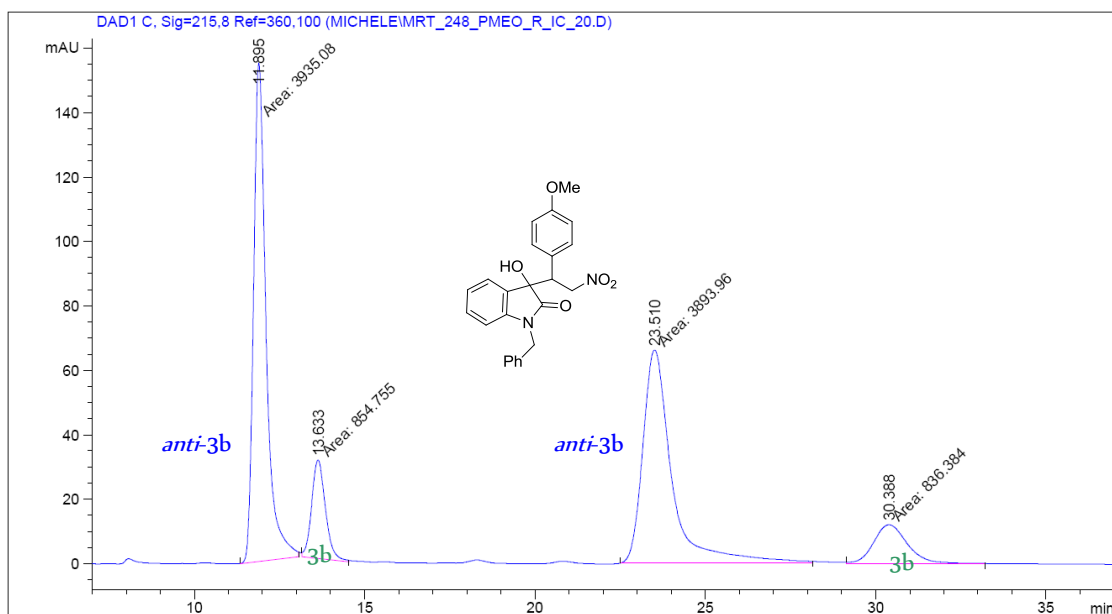

| Peak # | RetTime [min] | Type | Width [min] | Area [mAU*s] | Height [mAU] | Area %  |
|--------|---------------|------|-------------|--------------|--------------|---------|
| 1      | 11.895        | MM   | 0.4242      | 3935.07861   | 154.60648    | 41.3341 |
| 2      | 13.633        | MM   | 0.4666      | 854.75507    | 30.53231     | 8.9784  |
| 3      | 23.510        | MM   | 0.9831      | 3893.96094   | 66.01200     | 40.9022 |
| 4      | 30.388        | MM   | 1.1551      | 836.38373    | 12.06762     | 8.7854  |

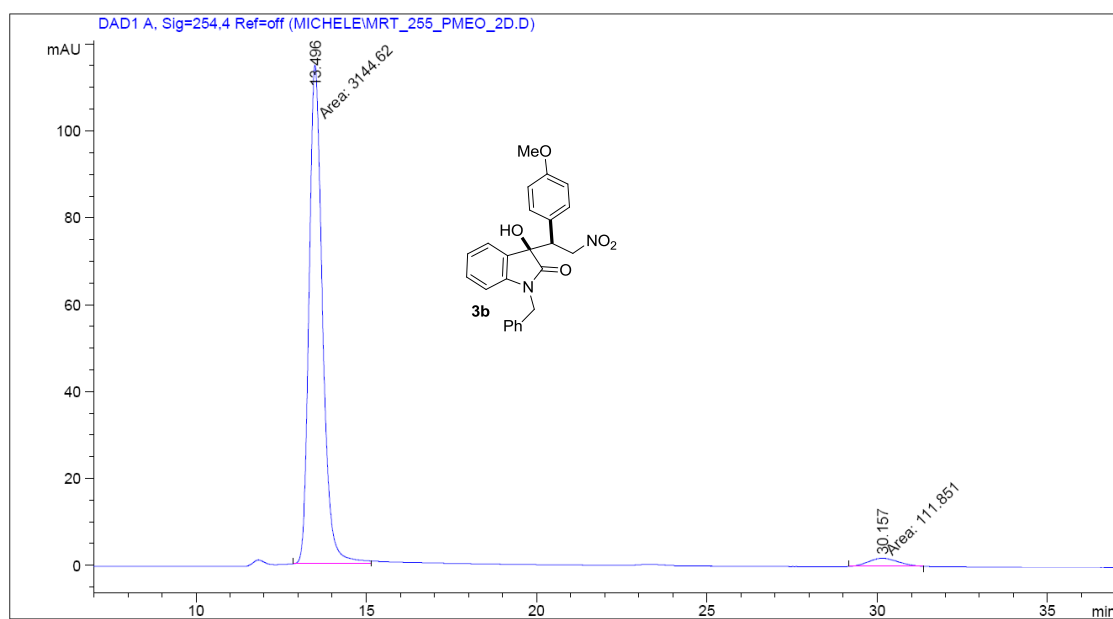

| Peak # | RetTime [min] | Type | Width [min] | Area [mAU*s] | Height [mAU] | Area %  |
|--------|---------------|------|-------------|--------------|--------------|---------|
| 1      | 13.496        | MM   | 0.4569      | 3144.62207   | 114.71009    | 96.5653 |
| 2      | 30.157        | MM   | 1.0132      | 111.85124    | 1.83997      | 3.4347  |

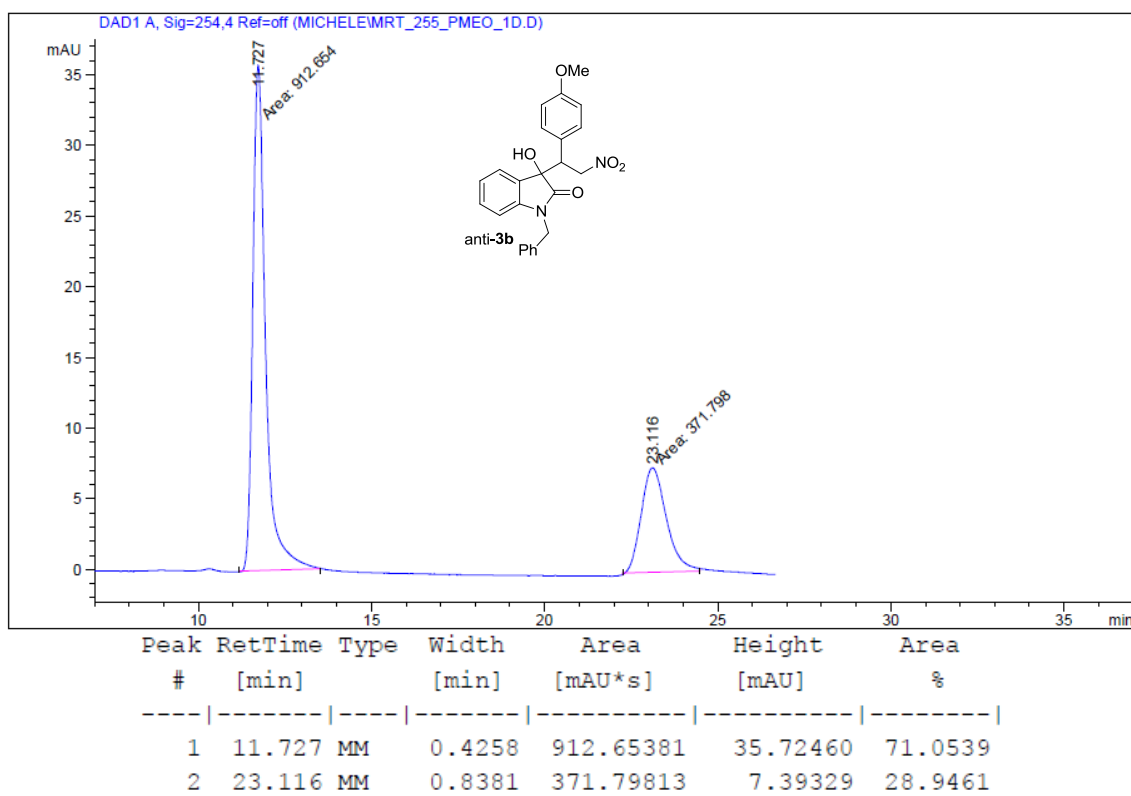

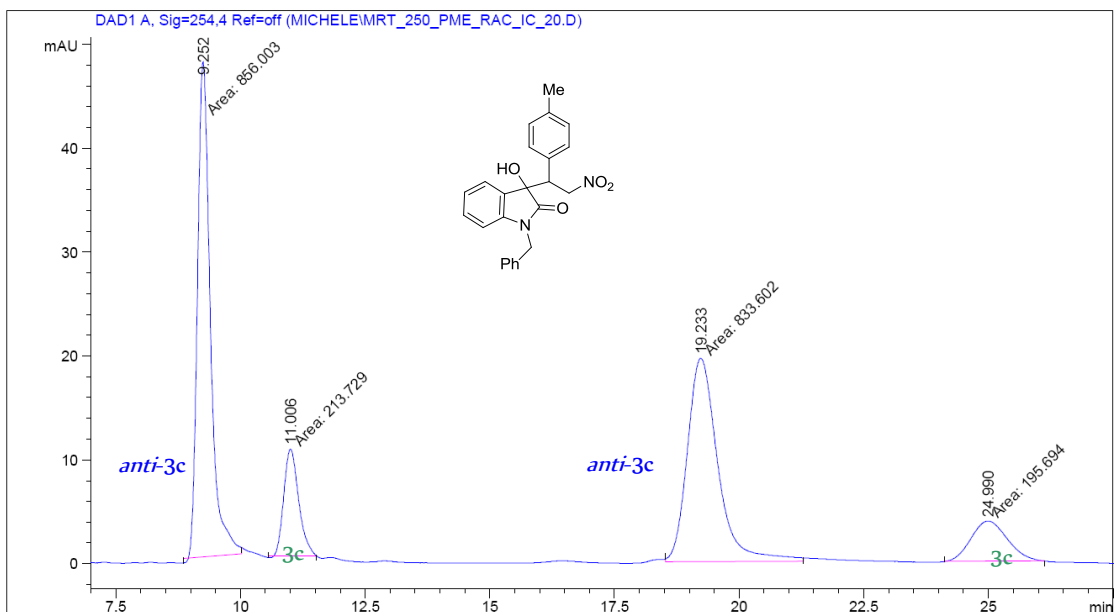

| Peak # | RetTime [min] | Type | Width [min] | Area [mAU*s] | Height [mAU] | Area %  |
|--------|---------------|------|-------------|--------------|--------------|---------|
| 1      | 9.252         | MM   | 0.2993      | 856.00281    | 47.66313     | 40.7809 |
| 2      | 11.006        | MM   | 0.3464      | 213.72865    | 10.28239     | 10.1823 |
| 3      | 19.233        | MM   | 0.7101      | 833.60199    | 19.56484     | 39.7137 |
| 4      | 24.990        | MM   | 0.8431      | 195.69441    | 3.86854      | 9.3231  |

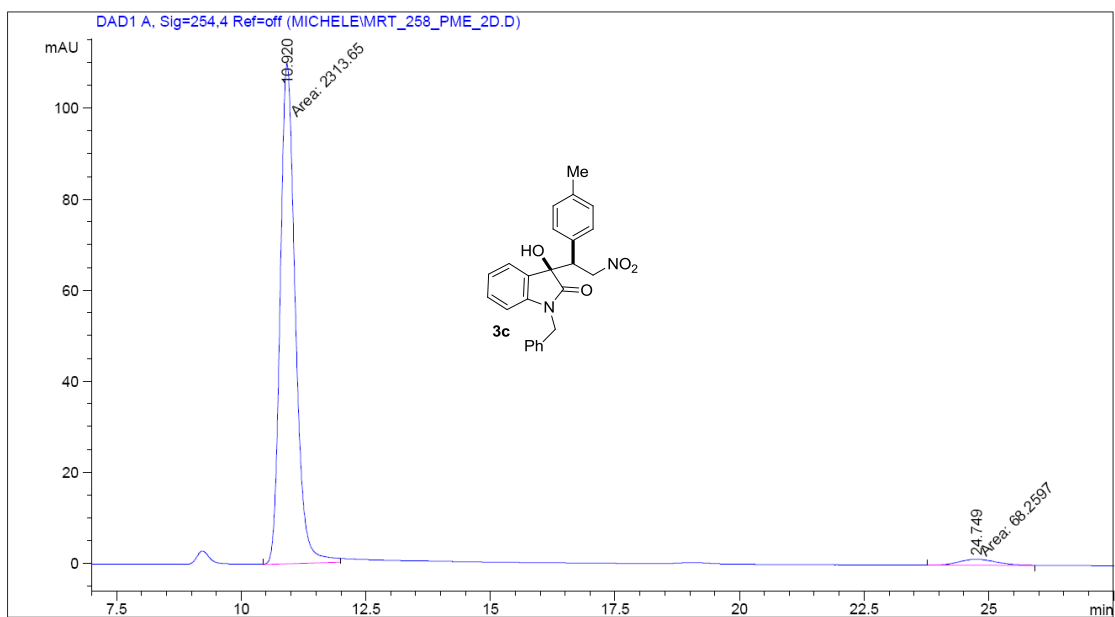

| Peak # | RetTime [min] | Type | Width [min] | Area [mAU*s] | Height [mAU] | Area %  |
|--------|---------------|------|-------------|--------------|--------------|---------|
| 1      | 10.920        | MM   | 0.3506      | 2313.65063   | 109.99335    | 97.1342 |
| 2      | 24.749        | MM   | 0.8577      | 68.25974     | 1.32643      | 2.8658  |

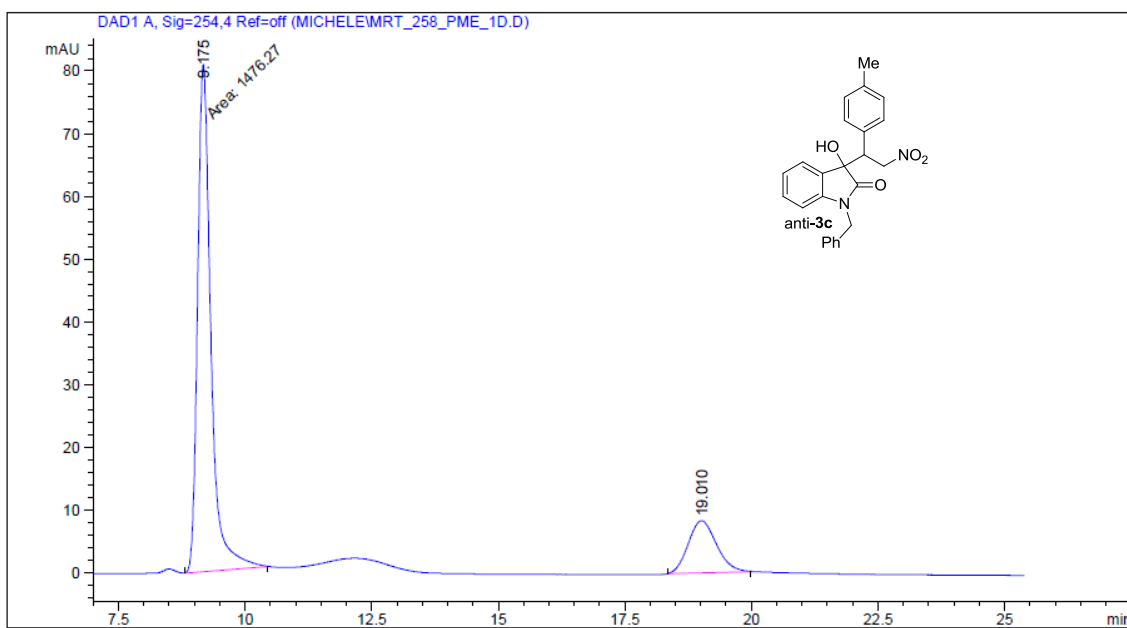

| Peak # | RetTime [min] | Type | Width [min] | Area [mAU*s] | Height [mAU] | Area %  |
|--------|---------------|------|-------------|--------------|--------------|---------|
| 1      | 9.175         | MM   | 0.3042      | 1476.26709   | 80.88093     | 81.9863 |
| 2      | 19.010        | BB   | 0.5841      | 324.35840    | 8.33425      | 18.0137 |

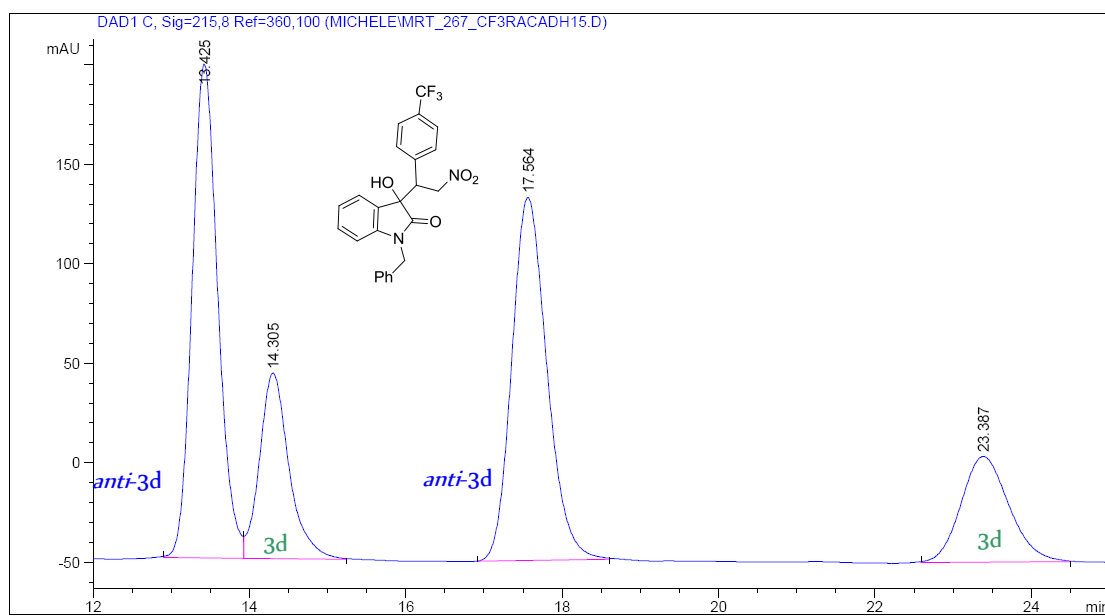

| Peak # | RetTime [min] | Type | Width [min] | Area [mAU*s] | Height [mAU] | Area %  |
|--------|---------------|------|-------------|--------------|--------------|---------|
| 1      | 13.425        | BV   | 0.3528      | 5682.37842   | 248.49239    | 35.3005 |
| 2      | 14.305        | VB   | 0.3960      | 2446.80933   | 93.29152     | 15.2003 |
| 3      | 17.564        | BB   | 0.4841      | 5701.38086   | 182.68100    | 35.4186 |
| 4      | 23.387        | BB   | 0.6590      | 2266.57202   | 53.21019     | 14.0806 |

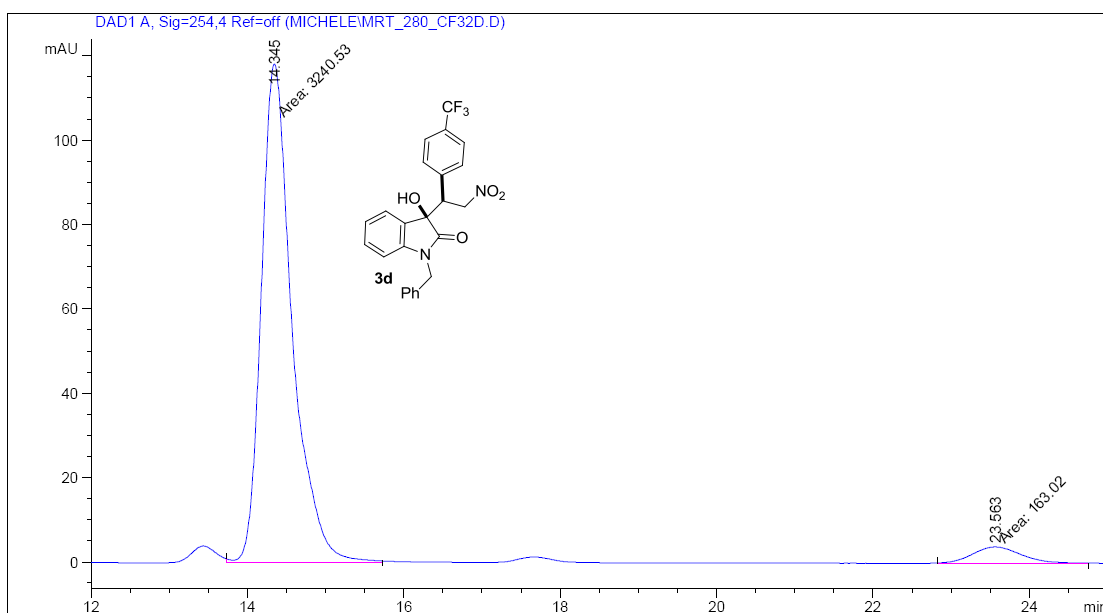

| Peak # | RetTime [min] | Type | Width [min] | Area [mAU*s] | Height [mAU] | Area %  |
|--------|---------------|------|-------------|--------------|--------------|---------|
| 1      | 14.345        | MM   | 0.4574      | 3240.52515   | 118.08537    | 95.2103 |
| 2      | 23.563        | MM   | 0.7105      | 163.01990    | 3.82406      | 4.7897  |

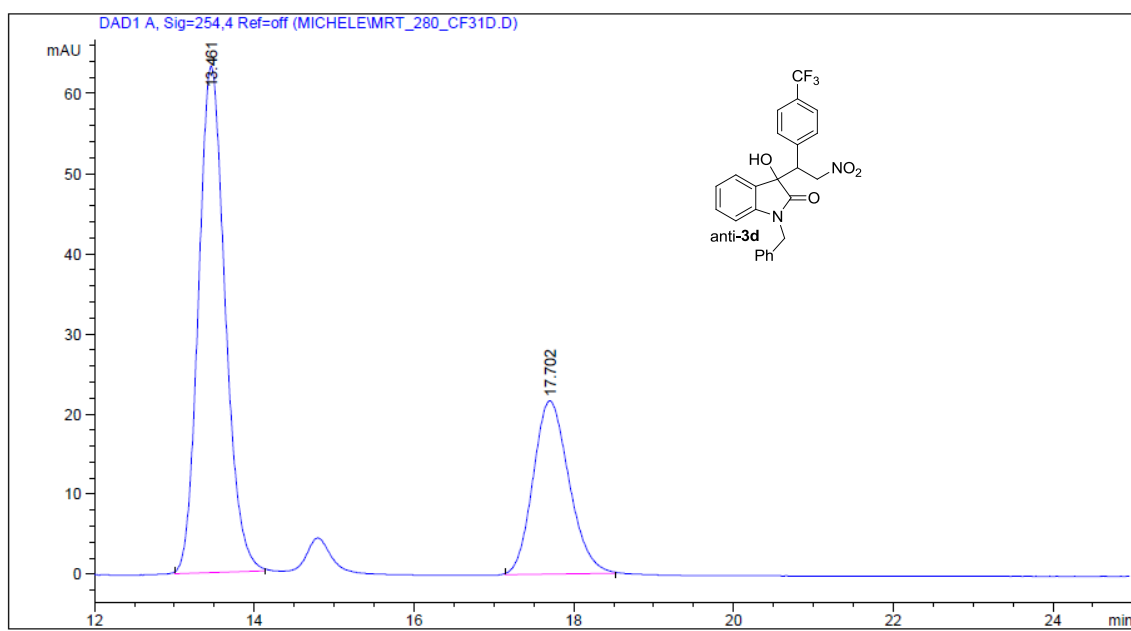

| Peak # | RetTime [min] | Type | Width [min] | Area [mAU*s] | Height [mAU] | Area %  |
|--------|---------------|------|-------------|--------------|--------------|---------|
| 1      | 13.461        | BB   | 0.3584      | 1465.61536   | 63.24152     | 68.3468 |
| 2      | 17.702        | BB   | 0.4799      | 678.76611    | 21.64062     | 31.6532 |



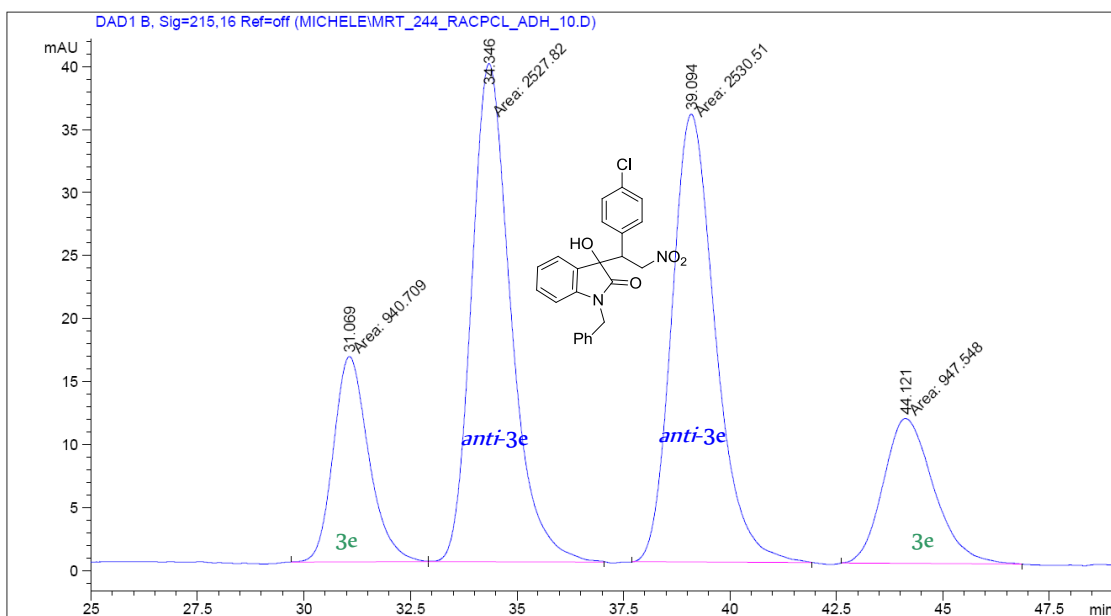

| Peak # | RetTime [min] | Type | Width [min] | Area [mAU*s] | Height [mAU] | Area %  |
|--------|---------------|------|-------------|--------------|--------------|---------|
| 1      | 31.069        | MM   | 0.9621      | 940.70929    | 16.29585     | 13.5420 |
| 2      | 34.346        | MM   | 1.0657      | 2527.82202   | 39.53198     | 36.3894 |
| 3      | 39.094        | MM   | 1.1872      | 2530.50854   | 35.52451     | 36.4281 |
| 4      | 44.121        | MM   | 1.3720      | 947.54834    | 11.51072     | 13.6405 |

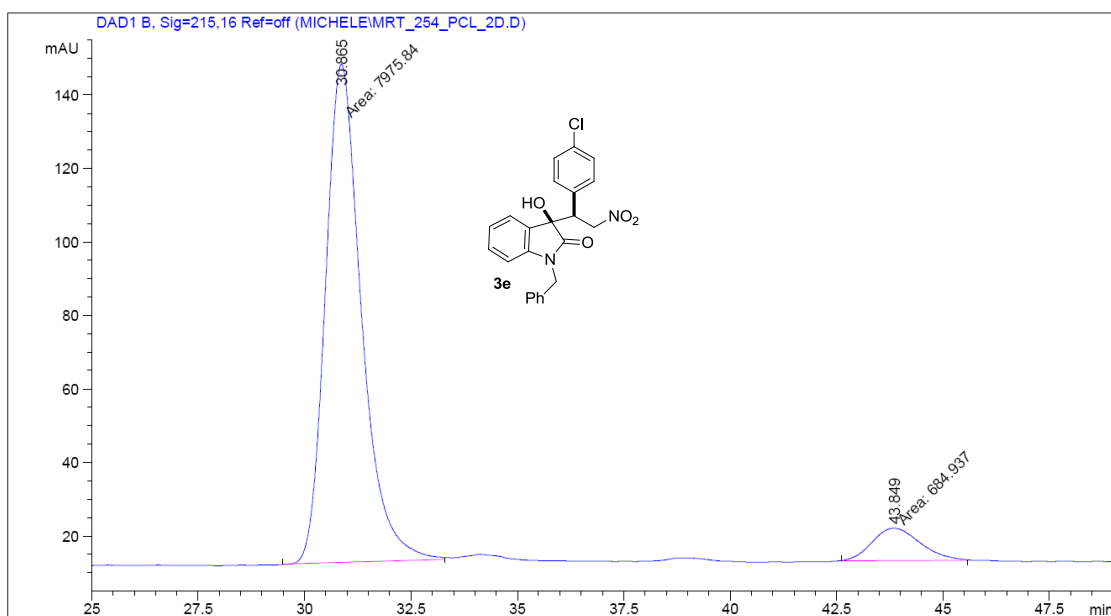

| Peak # | RetTime [min] | Type | Width [min] | Area [mAU*s] | Height [mAU] | Area %  |
|--------|---------------|------|-------------|--------------|--------------|---------|
| 1      | 30.865        | MM   | 0.9806      | 7975.83887   | 135.55457    | 92.0915 |
| 2      | 43.849        | MM   | 1.3035      | 684.93707    | 8.75749      | 7.9085  |

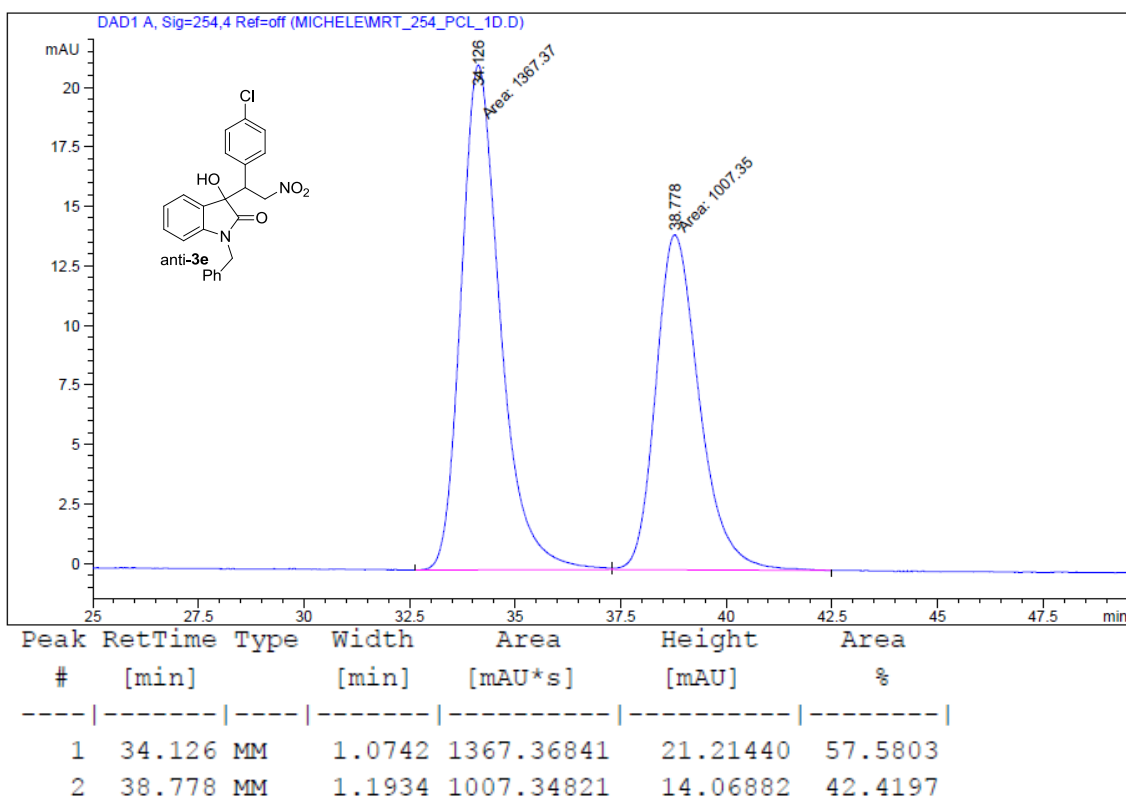

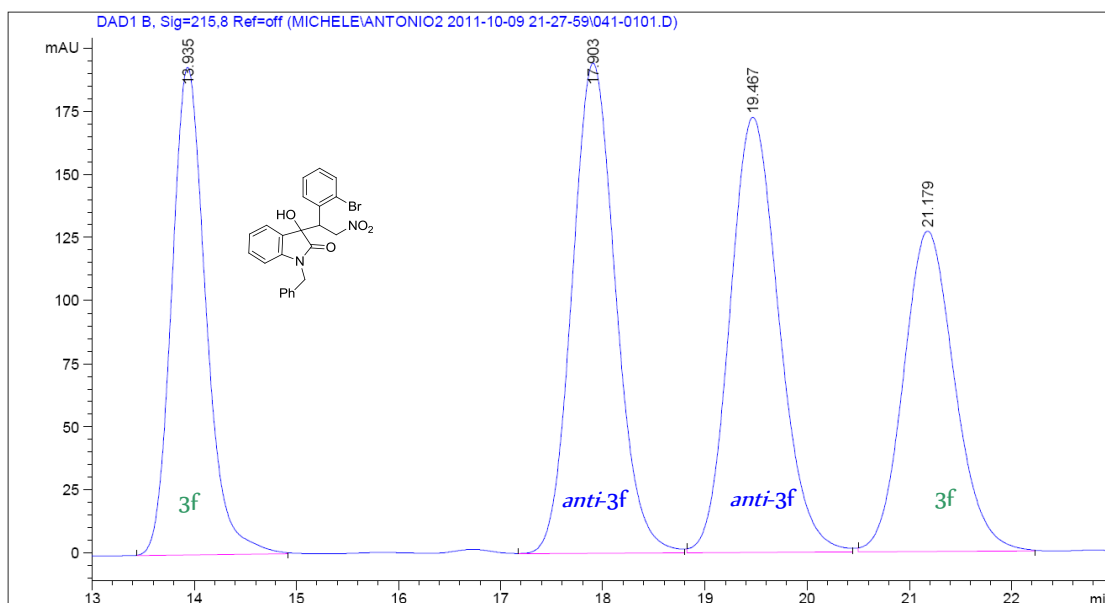

| Peak # | RetTime [min] | Type | Width [min] | Area [mAU*s] | Height [mAU] | Area %  |
|--------|---------------|------|-------------|--------------|--------------|---------|
| 1      | 13.935        | BB   | 0.3563      | 4475.63428   | 193.19865    | 21.9487 |
| 2      | 17.903        | VB   | 0.4592      | 5746.39453   | 194.18765    | 28.1806 |
| 3      | 19.467        | BB   | 0.5193      | 5751.87061   | 172.39323    | 28.2075 |
| 4      | 21.179        | BB   | 0.5379      | 4417.41260   | 126.95859    | 21.6632 |

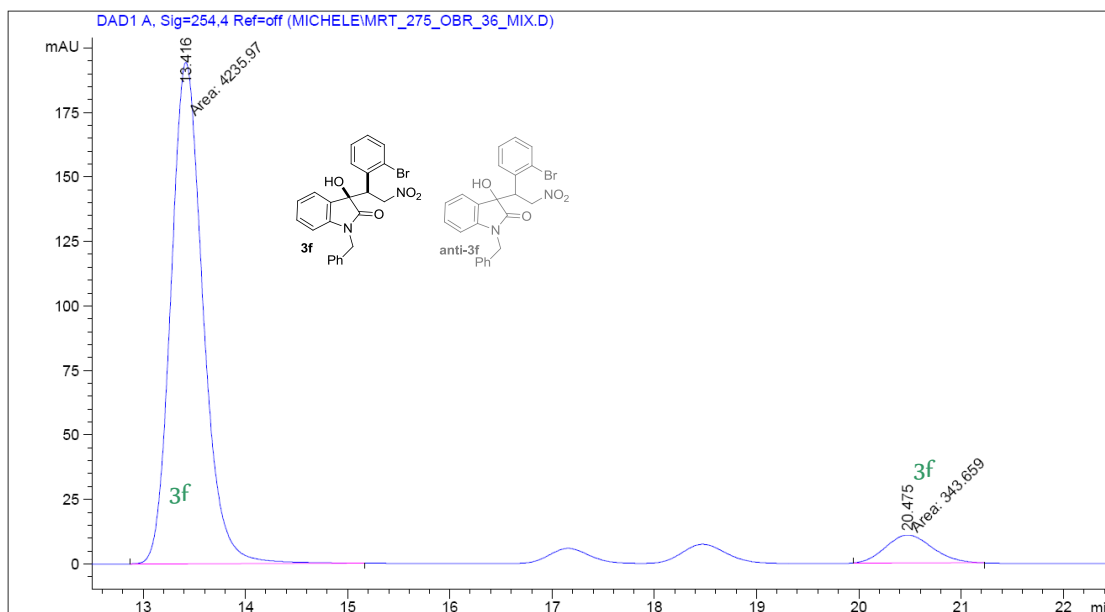

| Peak # | RetTime [min] | Type | Width [min] | Area [mAU*s] | Height [mAU] | Area %  |
|--------|---------------|------|-------------|--------------|--------------|---------|
| 1      | 13.416        | MM   | 0.3631      | 4235.96631   | 194.42365    | 92.4959 |
| 2      | 20.475        | MM   | 0.5299      | 343.65897    | 10.80970     | 7.5041  |

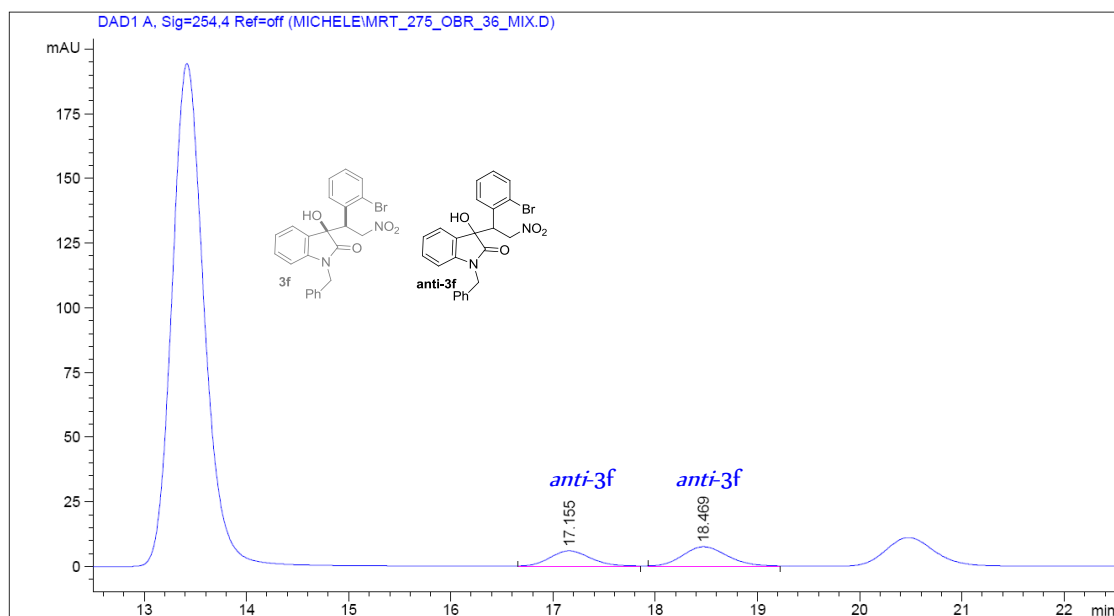

| Peak # | RetTime [min] | Type | Width [min] | Area [mAU*s] | Height [mAU] | Area %  |
|--------|---------------|------|-------------|--------------|--------------|---------|
| 1      | 17.155        | BB   | 0.4233      | 161.22639    | 5.89122      | 41.5241 |
| 2      | 18.469        | BB   | 0.4589      | 227.04591    | 7.50520      | 58.4759 |

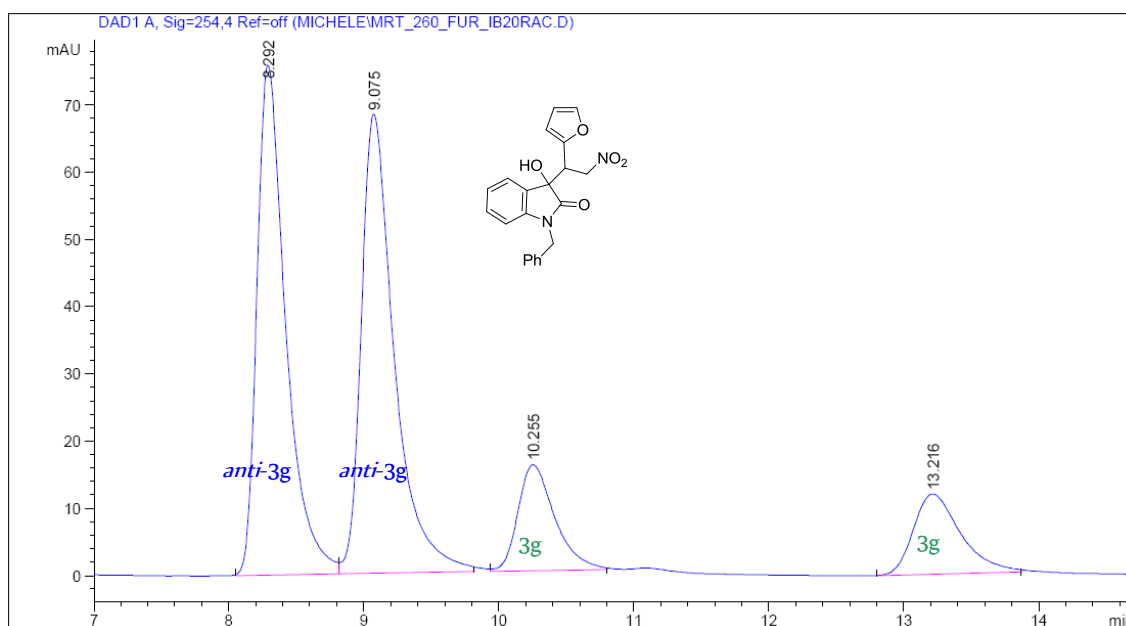

| Peak # | RetTime [min] | Type | Width [min] | Area [mAU*s] | Height [mAU] | Area %  |
|--------|---------------|------|-------------|--------------|--------------|---------|
| 1      | 8.292         | BV   | 0.2210      | 1124.41223   | 75.84919     | 39.1049 |
| 2      | 9.075         | VB   | 0.2526      | 1163.04333   | 68.31539     | 40.4484 |
| 3      | 10.255        | BB   | 0.2850      | 298.39200    | 15.75316     | 10.3775 |
| 4      | 13.216        | BB   | 0.3693      | 289.52612    | 11.92242     | 10.0692 |

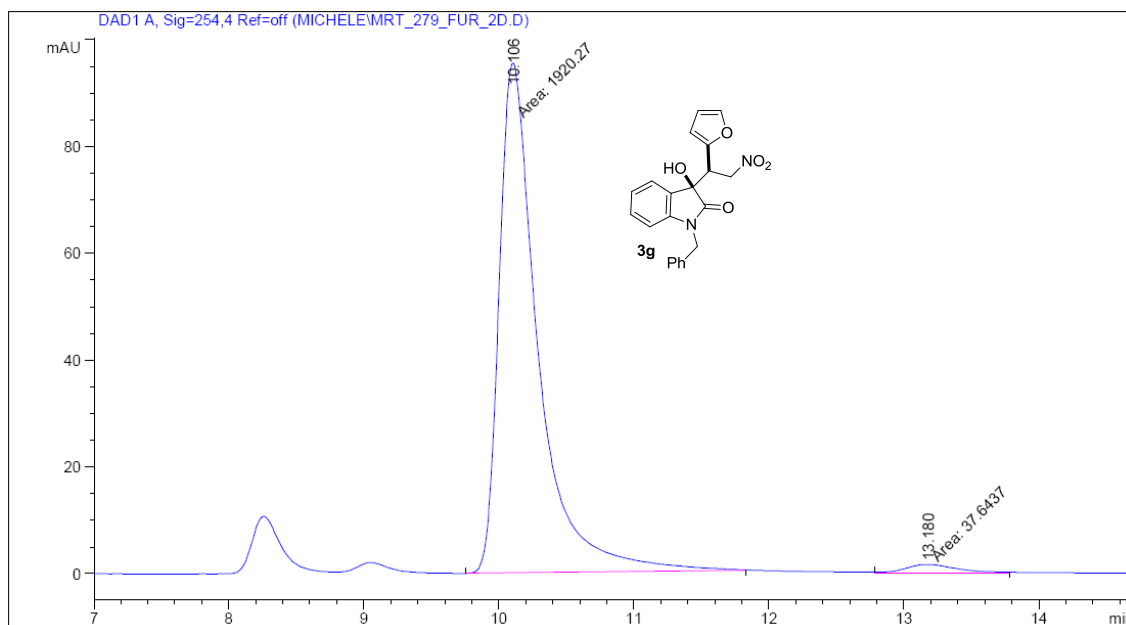

| Peak # | RetTime [min] | Type | Width [min] | Area [mAU*s] | Height [mAU] | Area %  |
|--------|---------------|------|-------------|--------------|--------------|---------|
| 1      | 10.106        | MM   | 0.3353      | 1920.26807   | 95.45109     | 98.0774 |
| 2      | 13.180        | MM   | 0.4109      | 37.64372     | 1.52704      | 1.9226  |

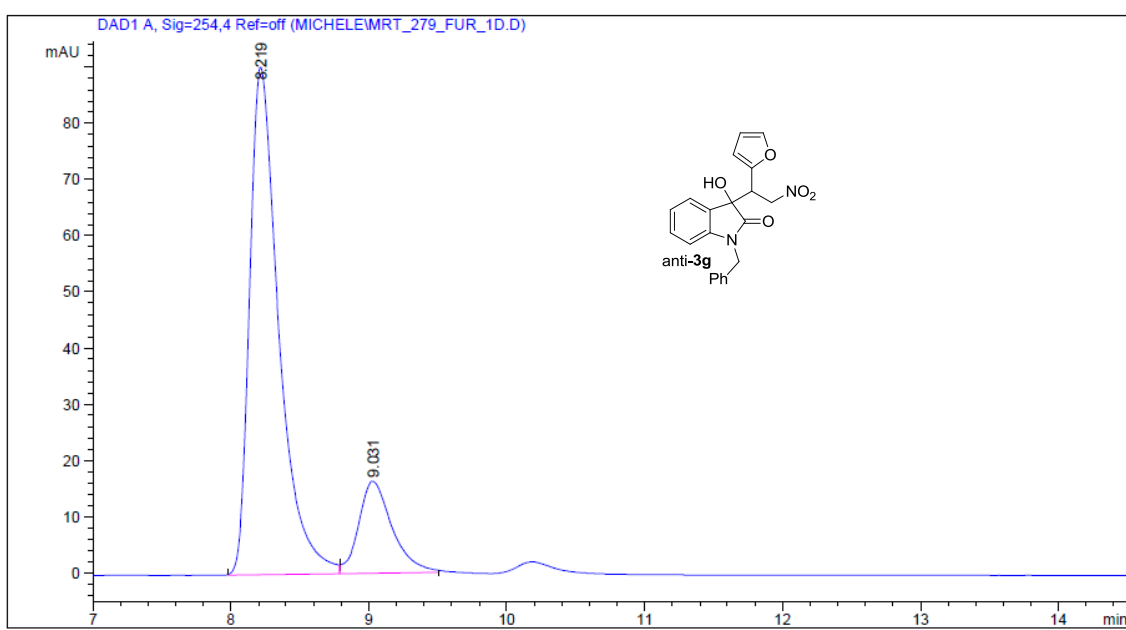

| Peak # | RetTime [min] | Type | Width [min] | Area [mAU*s] | Height [mAU] | Area %  |
|--------|---------------|------|-------------|--------------|--------------|---------|
| 1      | 8.219         | BV   | 0.2195      | 1328.30762   | 90.36085     | 82.8628 |
| 2      | 9.031         | VB   | 0.2519      | 274.71259    | 16.35830     | 17.1372 |

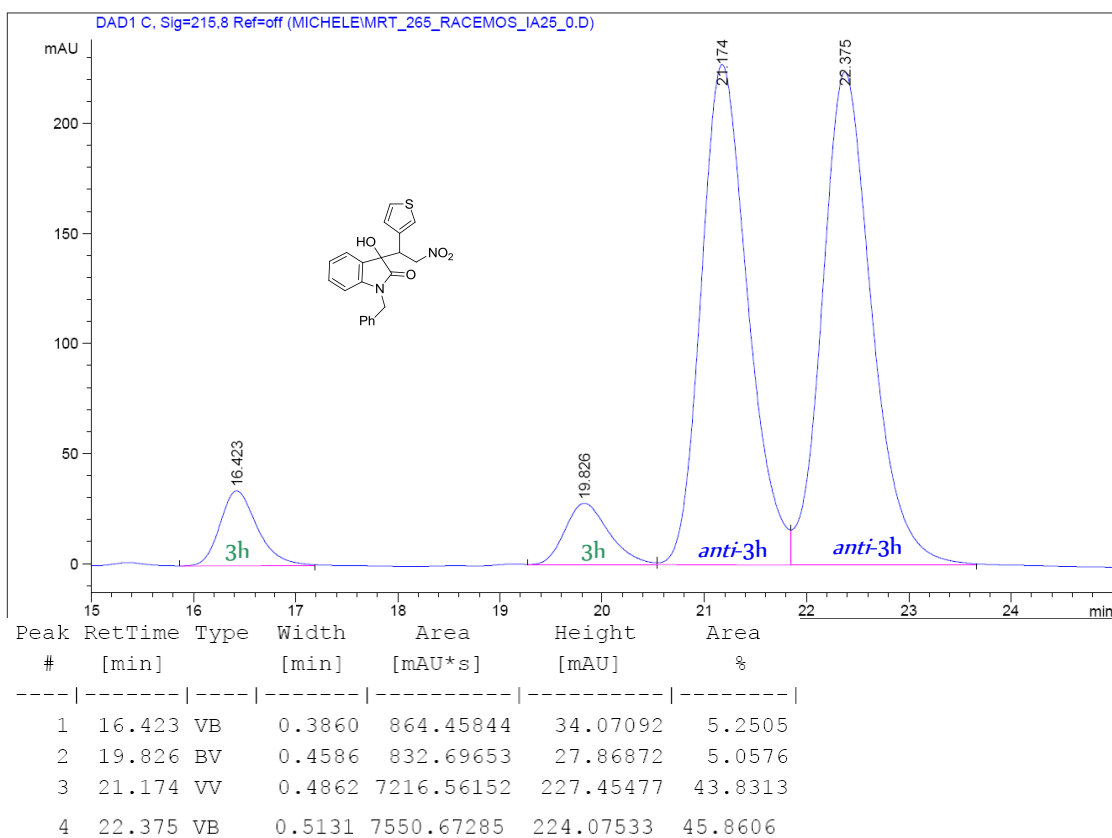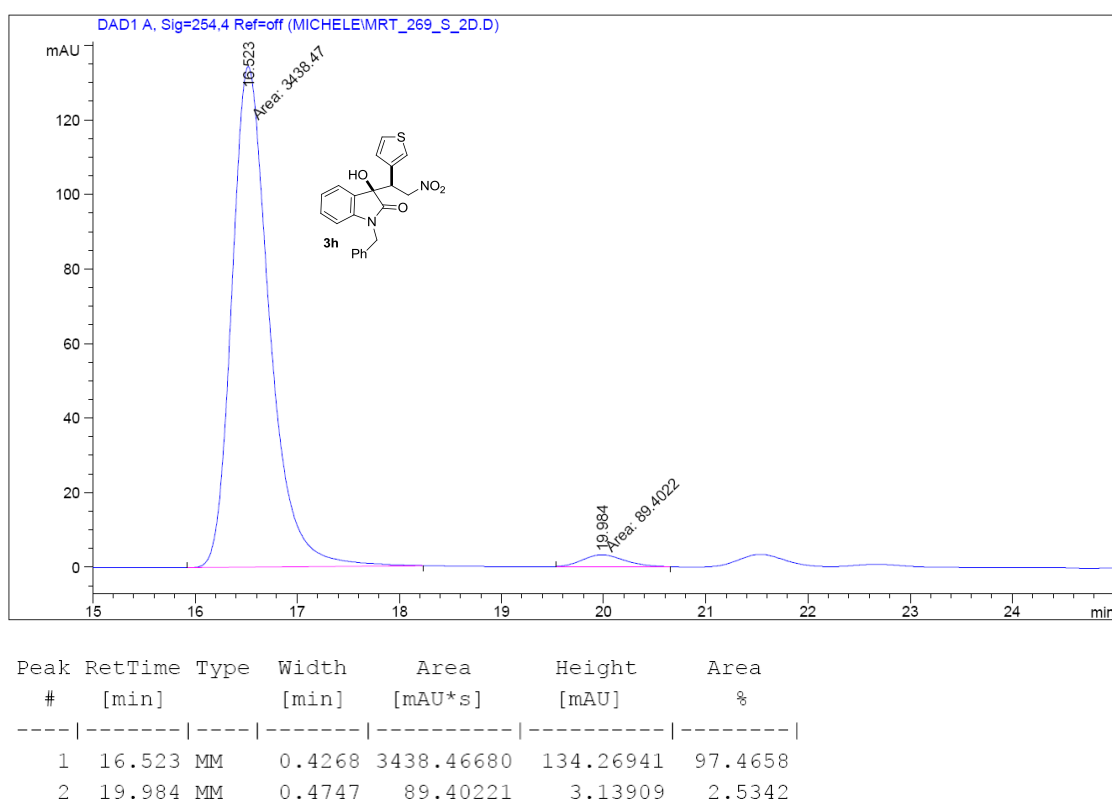

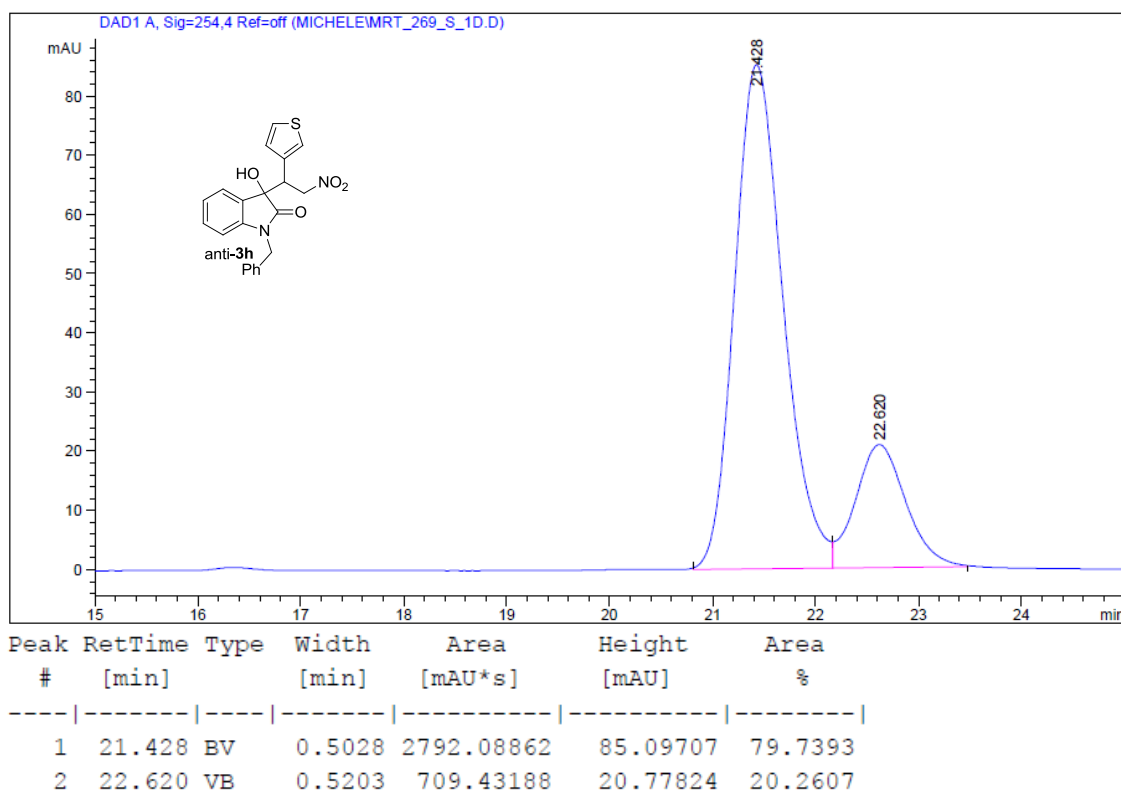



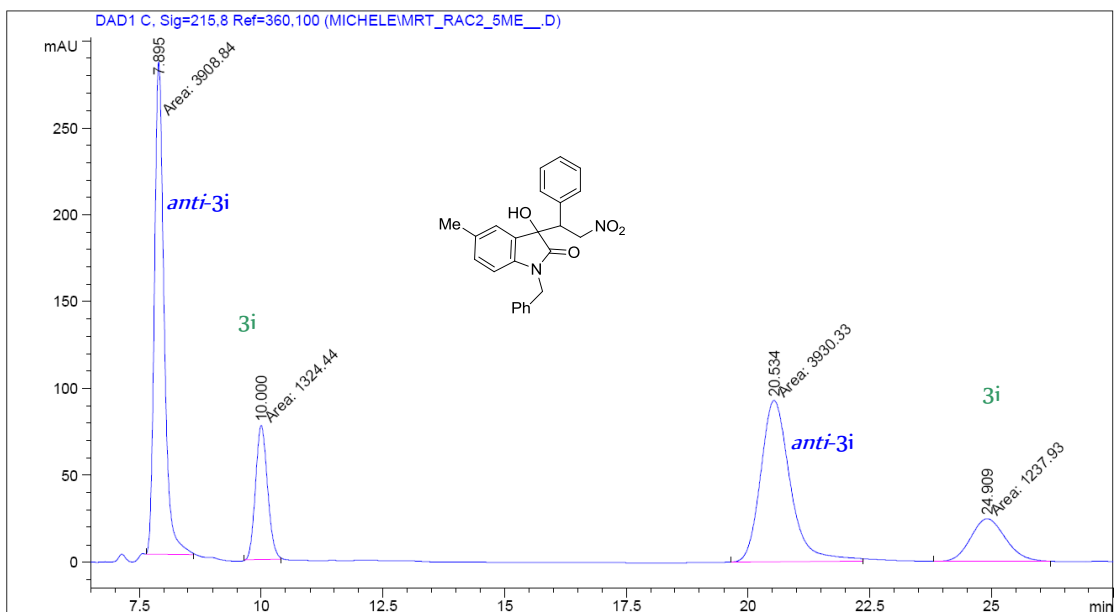

| Peak # | RetTime [min] | Type | Width [min] | Area [mAU*s] | Height [mAU] | Area %  |
|--------|---------------|------|-------------|--------------|--------------|---------|
| 1      | 7.895         | MM   | 0.2298      | 3908.83716   | 283.46036    | 37.5794 |
| 2      | 10.000        | MM   | 0.2859      | 1324.43628   | 77.20145     | 12.7331 |
| 3      | 20.534        | MM   | 0.7052      | 3930.33350   | 92.88862     | 37.7861 |
| 4      | 24.909        | MM   | 0.8380      | 1237.93286   | 24.61959     | 11.9014 |

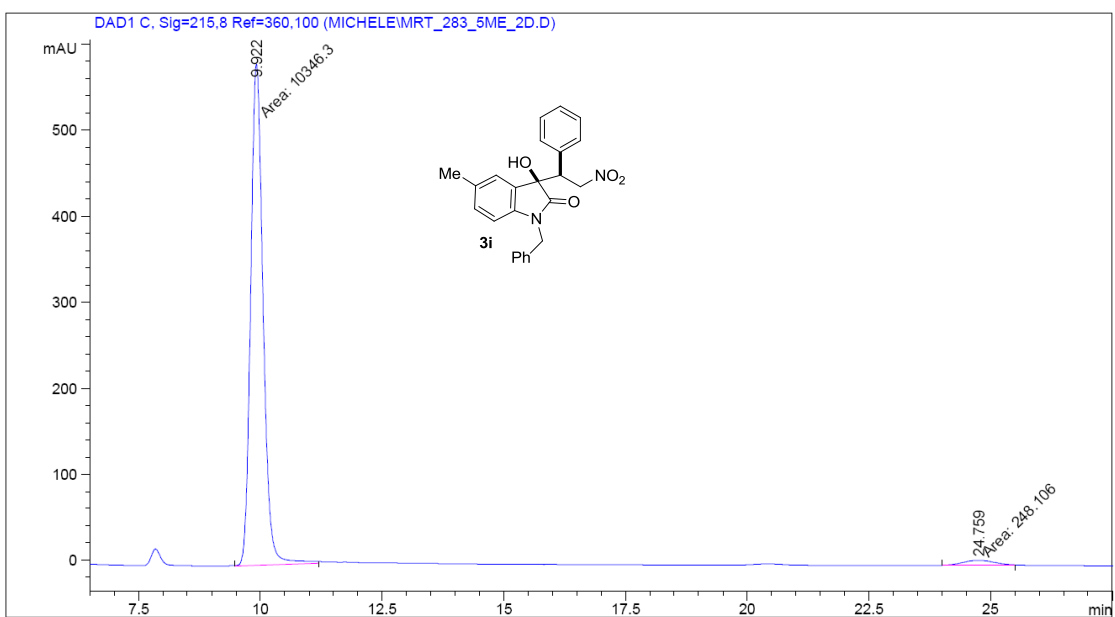

| Peak # | RetTime [min] | Type | Width [min] | Area [mAU*s] | Height [mAU] | Area %  |
|--------|---------------|------|-------------|--------------|--------------|---------|
| 1      | 9.922         | MM   | 0.2963      | 1.03463e4    | 582.03857    | 97.6581 |
| 2      | 24.759        | MM   | 0.7454      | 248.10588    | 5.54713      | 2.3419  |

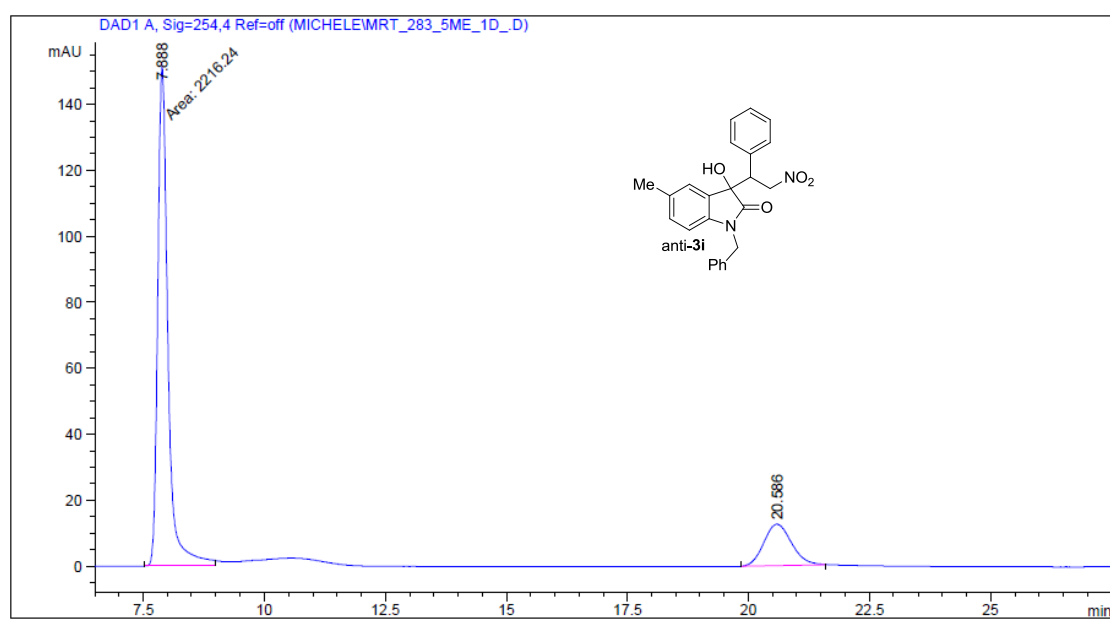

| Peak # | RetTime [min] | Type | Width [min] | Area [mAU*s] | Height [mAU] | Area %  |
|--------|---------------|------|-------------|--------------|--------------|---------|
| 1      | 7.888         | MM   | 0.2441      | 2216.24072   | 151.32629    | 81.4882 |
| 2      | 20.586        | BB   | 0.6140      | 503.46829    | 12.60379     | 18.5118 |

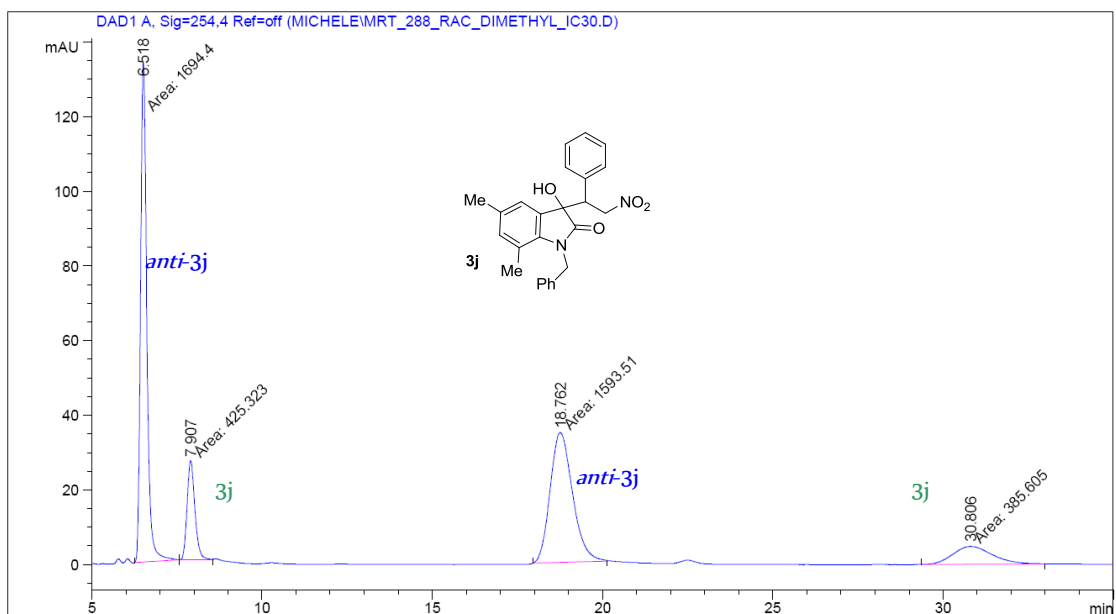

| Peak # | RetTime [min] | Type | Width [min] | Area [mAU*s] | Height [mAU] | Area %  |
|--------|---------------|------|-------------|--------------|--------------|---------|
| 1      | 6.518         | MM   | 0.2113      | 1694.40076   | 133.67897    | 41.3386 |
| 2      | 7.907         | MM   | 0.2665      | 425.32330    | 26.59617     | 10.3767 |
| 3      | 18.762        | MM   | 0.7644      | 1593.50903   | 34.74372     | 38.8771 |
| 4      | 30.806        | MM   | 1.3453      | 385.60507    | 4.77703      | 9.4077  |

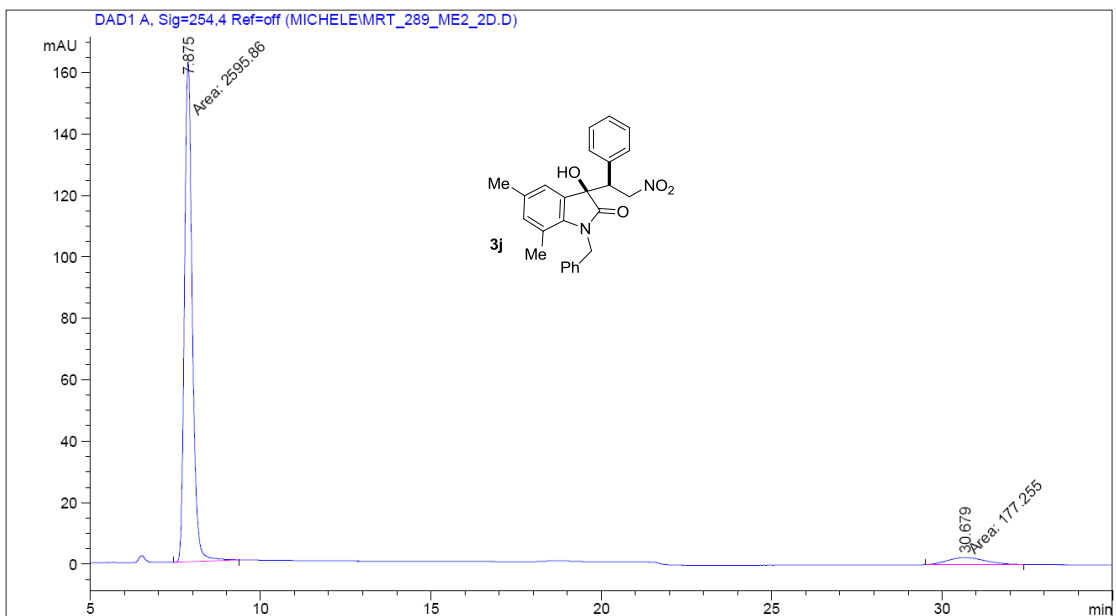

| Peak # | RetTime [min] | Type | Width [min] | Area [mAU*s] | Height [mAU] | Area %  |
|--------|---------------|------|-------------|--------------|--------------|---------|
| 1      | 7.875         | MM   | 0.2657      | 2595.86108   | 162.85275    | 93.6081 |
| 2      | 30.679        | MM   | 1.2813      | 177.25516    | 2.30567      | 6.3919  |

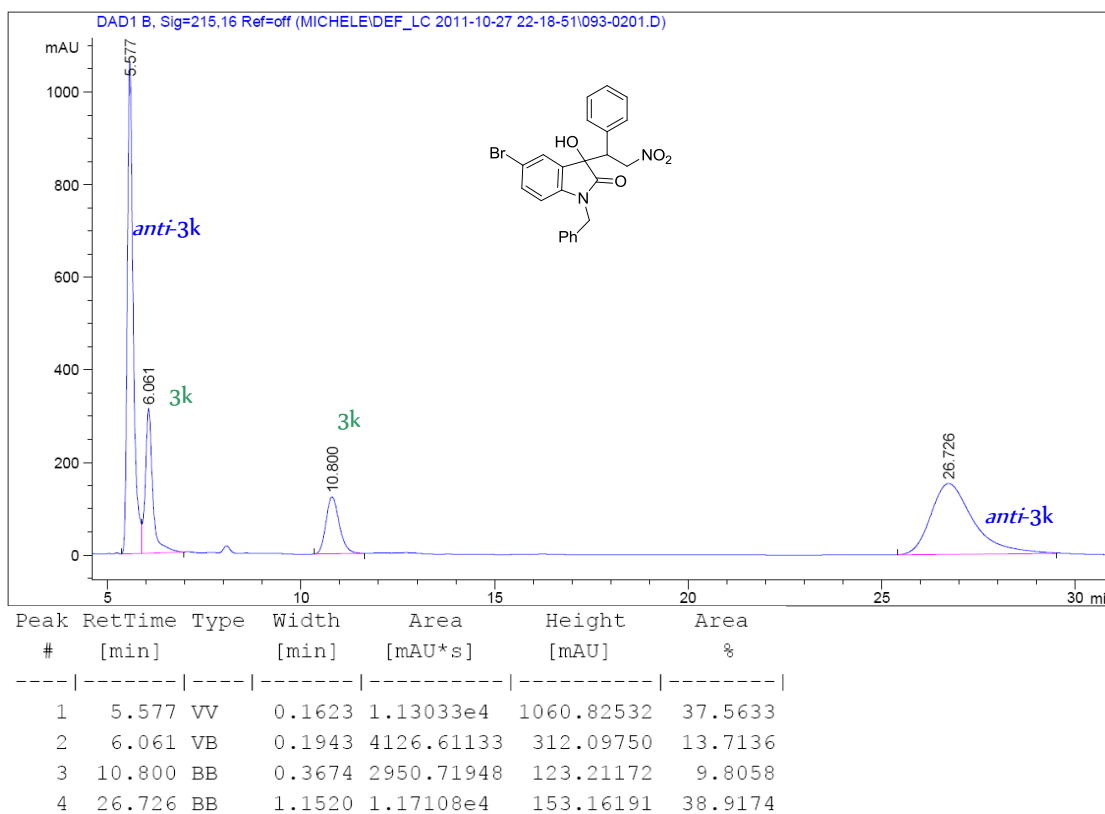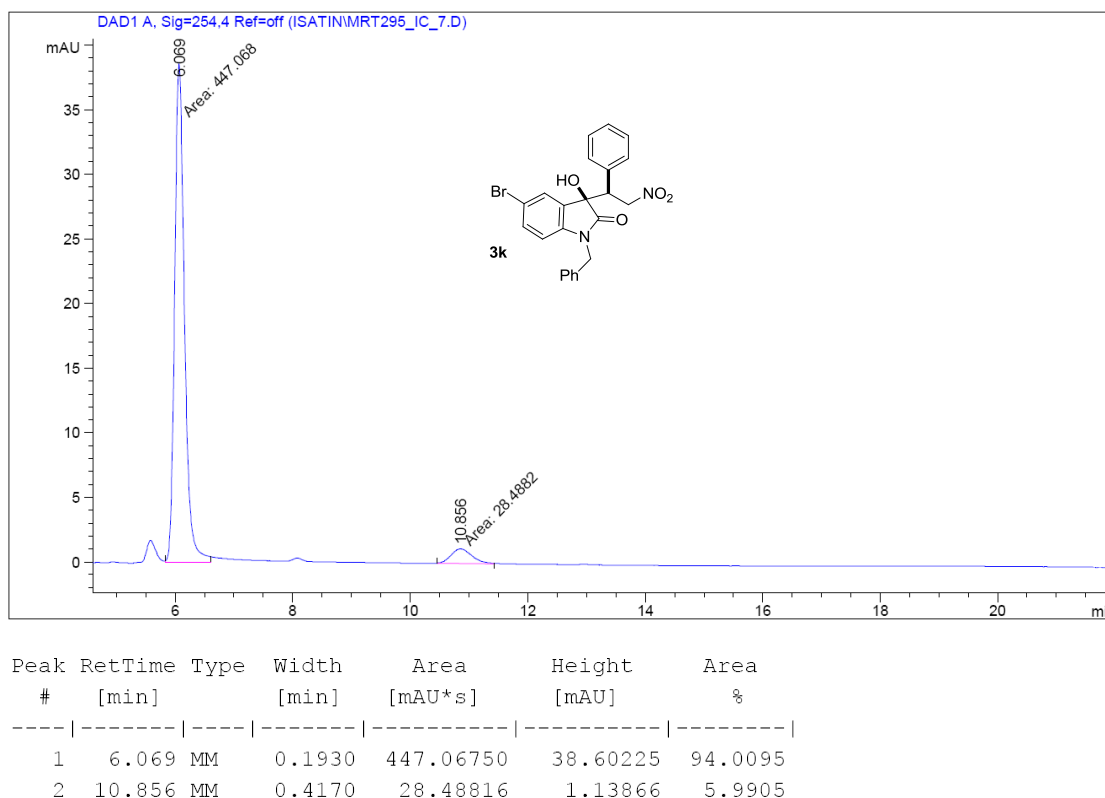

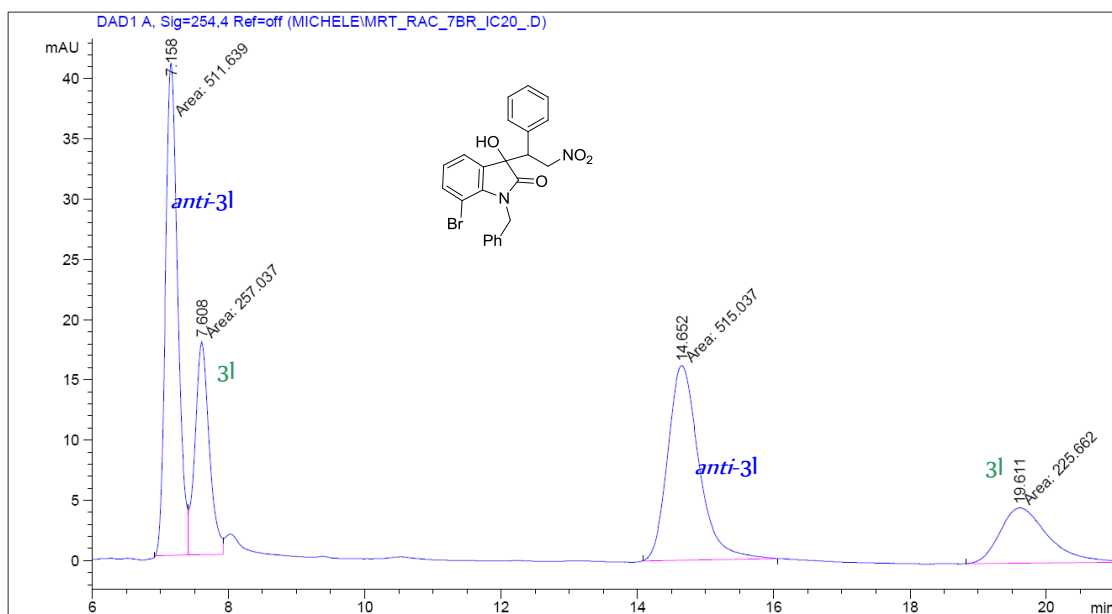

| Peak # | RetTime [min] | Type | Width [min] | Area [mAU*s] | Height [mAU] | Area %  |
|--------|---------------|------|-------------|--------------|--------------|---------|
| 1      | 7.158         | MF   | 0.2086      | 511.63928    | 40.87704     | 33.8974 |
| 2      | 7.608         | FM   | 0.2421      | 257.03687    | 17.69451     | 17.0294 |
| 3      | 14.652        | MM   | 0.5310      | 515.03705    | 16.16449     | 34.1225 |
| 4      | 19.611        | MM   | 0.8171      | 225.66153    | 4.60315      | 14.9507 |

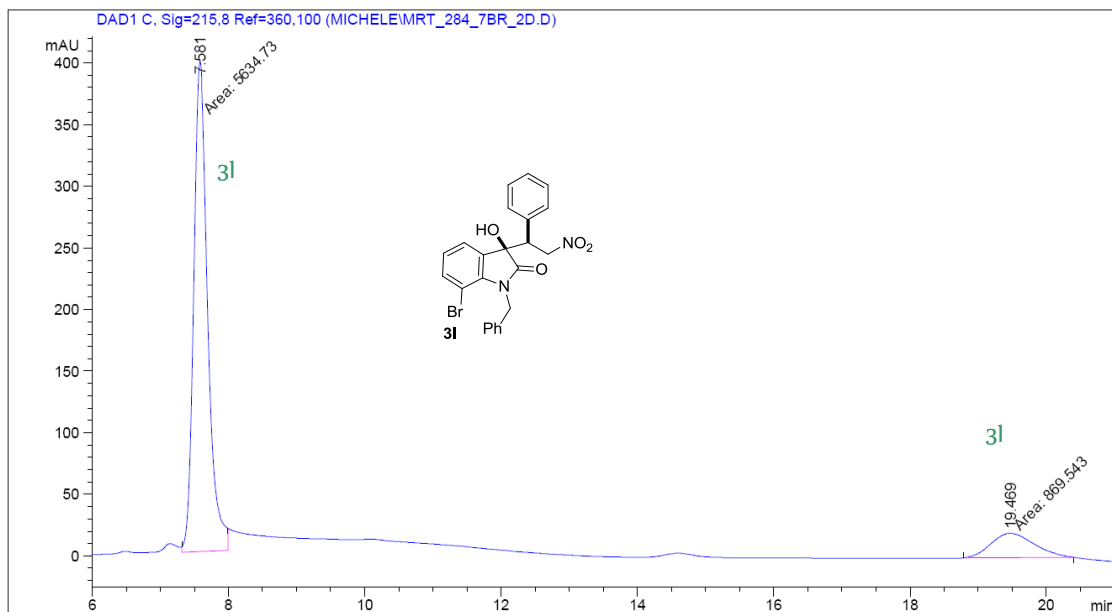

| Peak # | RetTime [min] | Type | Width [min] | Area [mAU*s] | Height [mAU] | Area %  |
|--------|---------------|------|-------------|--------------|--------------|---------|
| 1      | 7.581         | MM   | 0.2358      | 5634.72998   | 398.27908    | 86.6312 |
| 2      | 19.469        | MM   | 0.7375      | 869.54254    | 19.65057     | 13.3688 |

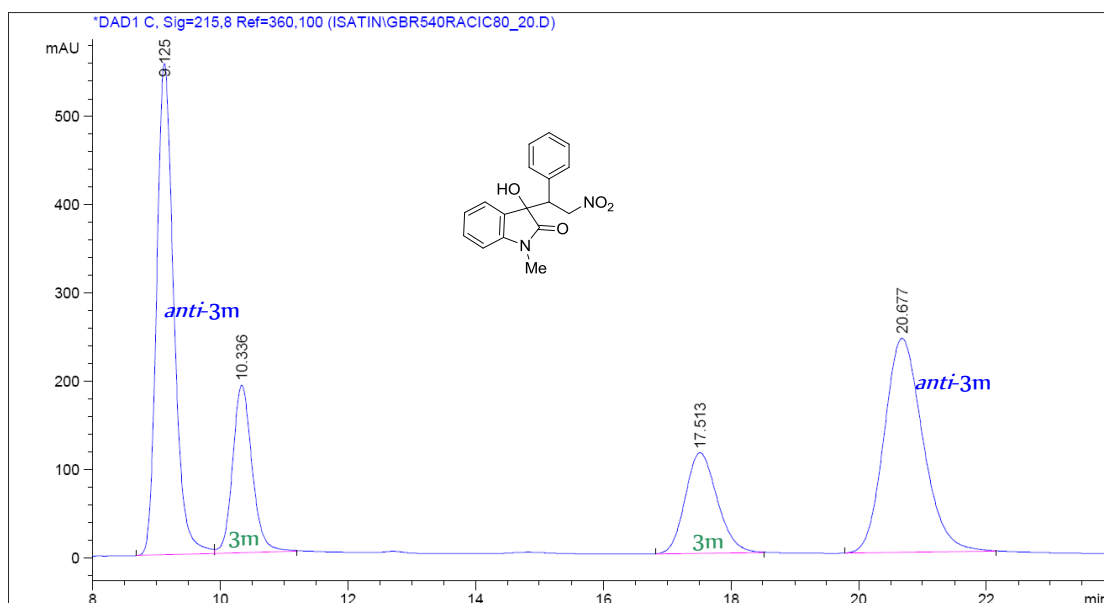

| Peak # | RetTime [min] | Type | Width [min] | Area [mAU*s] | Height [mAU] | Area %  |
|--------|---------------|------|-------------|--------------|--------------|---------|
| 1      | 9.125         | BV   | 0.2875      | 1.03746e4    | 556.37018    | 36.2834 |
| 2      | 10.336        | VB   | 0.3244      | 4013.17261   | 190.04608    | 14.0353 |
| 3      | 17.513        | BB   | 0.5385      | 3973.15015   | 114.03845    | 13.8954 |
| 4      | 20.677        | BB   | 0.6520      | 1.02324e4    | 242.62668    | 35.7859 |

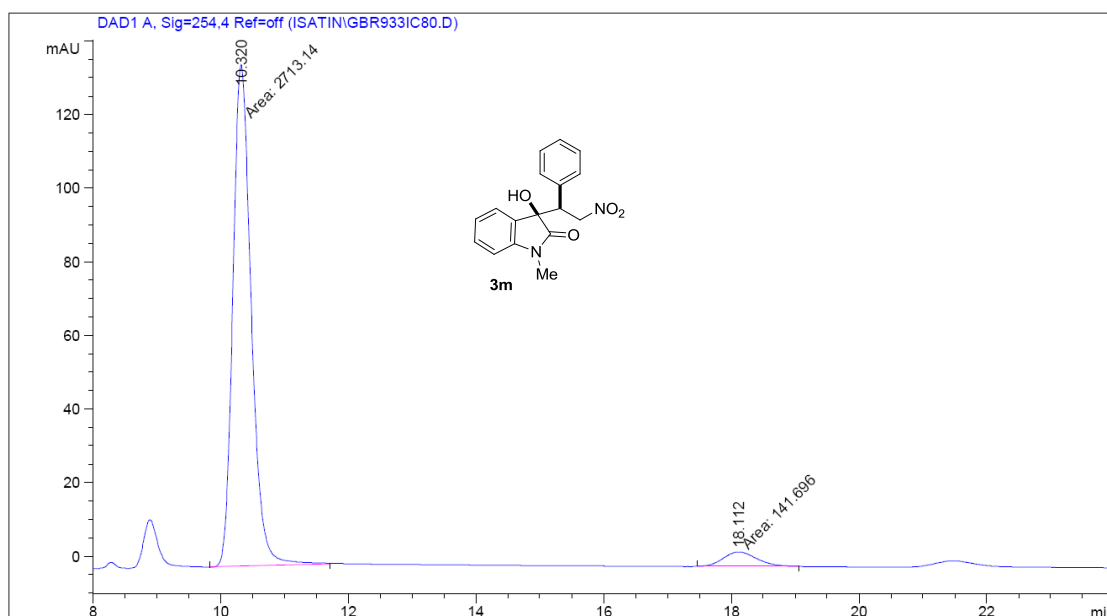

| Peak # | RetTime [min] | Type | Width [min] | Area [mAU*s] | Height [mAU] | Area %  |
|--------|---------------|------|-------------|--------------|--------------|---------|
| 1      | 10.320        | MM   | 0.3319      | 2713.14136   | 136.25034    | 95.0366 |
| 2      | 18.112        | MM   | 0.6058      | 141.69617    | 3.89857      | 4.9634  |

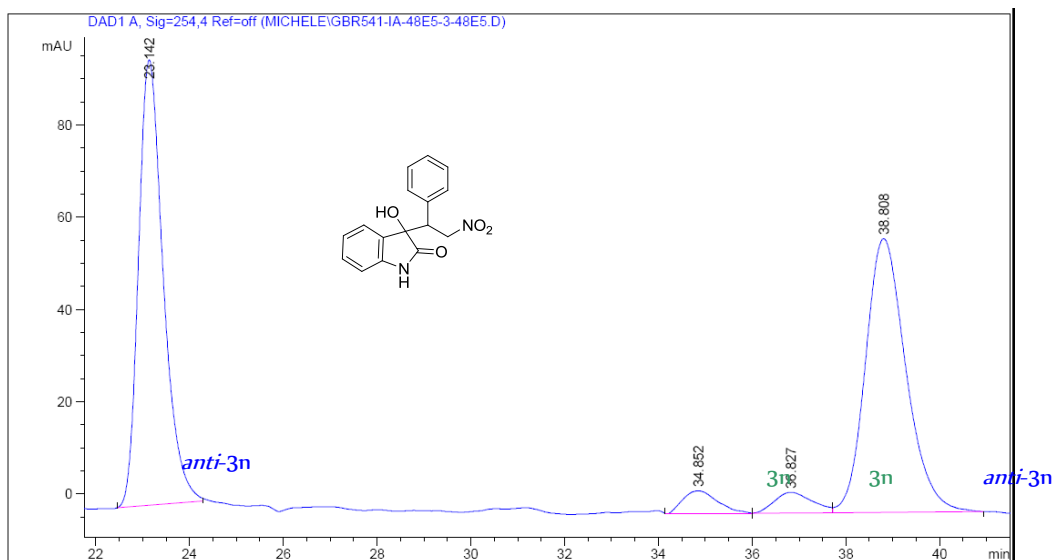

| Peak # | RetTime [min] | Type | Width [min] | Area [mAU*s] | Height [mAU] | Area %  |
|--------|---------------|------|-------------|--------------|--------------|---------|
| 1      | 23.142        | BB   | 0.5617      | 3539.88574   | 96.56834     | 46.6332 |
| 2      | 34.852        | BV   | 0.7355      | 245.69684    | 4.86223      | 3.2367  |
| 3      | 36.827        | VV   | 0.7563      | 249.37114    | 4.43319      | 3.2851  |
| 4      | 38.808        | VB   | 0.9149      | 3555.95483   | 59.35760     | 46.8449 |

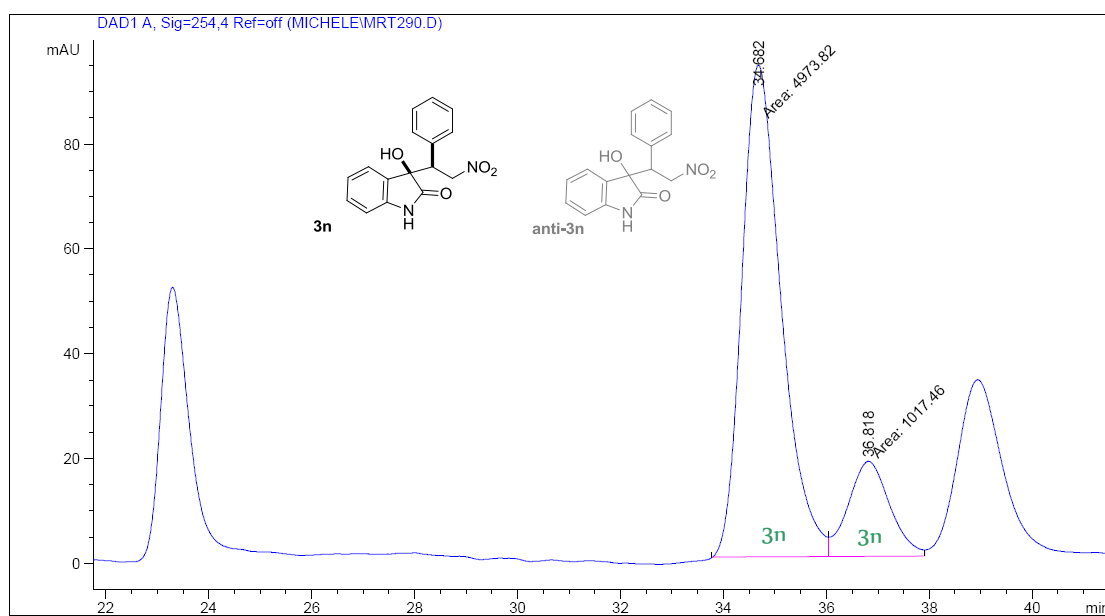

| Peak # | RetTime [min] | Type | Width [min] | Area [mAU*s] | Height [mAU] | Area %  |
|--------|---------------|------|-------------|--------------|--------------|---------|
| 1      | 34.682        | MF   | 0.8832      | 4973.81592   | 93.86303     | 83.0176 |
| 2      | 36.818        | FM   | 0.9345      | 1017.46259   | 18.14571     | 16.9824 |

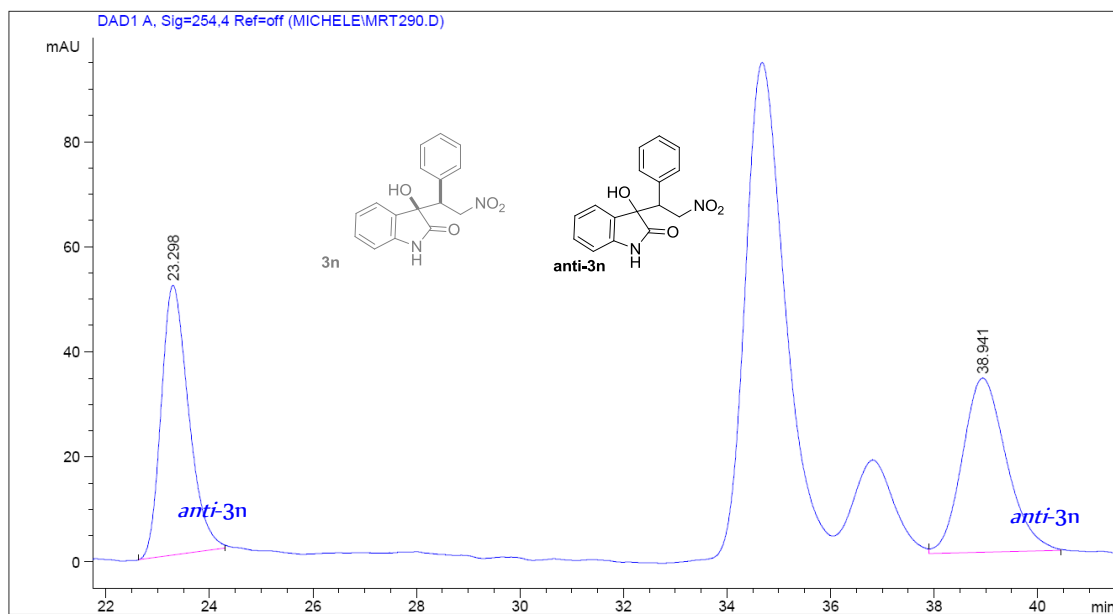

| Peak # | RetTime [min] | Type | Width [min] | Area [mAU*s] | Height [mAU] | Area %  |
|--------|---------------|------|-------------|--------------|--------------|---------|
| 1      | 23.298        | BB   | 0.5606      | 1885.74084   | 51.33454     | 49.0348 |
| 2      | 38.941        | VB   | 0.8996      | 1959.97913   | 33.15909     | 50.9652 |



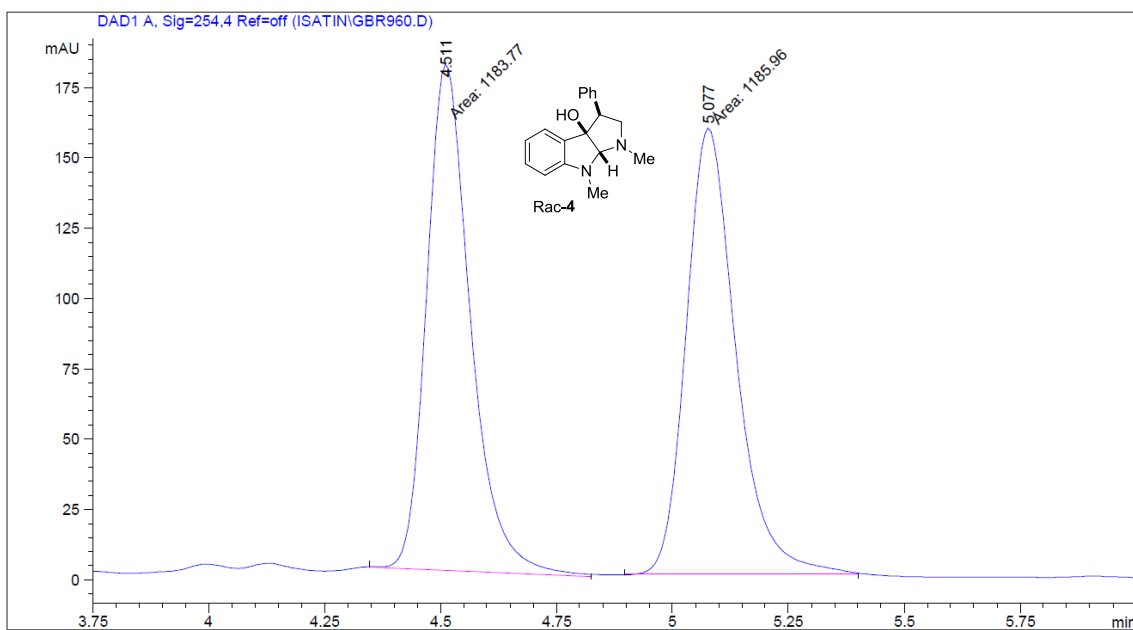

| Peak # | RetTime [min] | Type | Width [min] | Area [mAU*s] | Height [mAU] | Area %  |
|--------|---------------|------|-------------|--------------|--------------|---------|
| 1      | 4.511         | MM   | 0.1096      | 1183.77429   | 180.05664    | 49.9538 |
| 2      | 5.077         | MM   | 0.1246      | 1185.96240   | 158.68541    | 50.0462 |

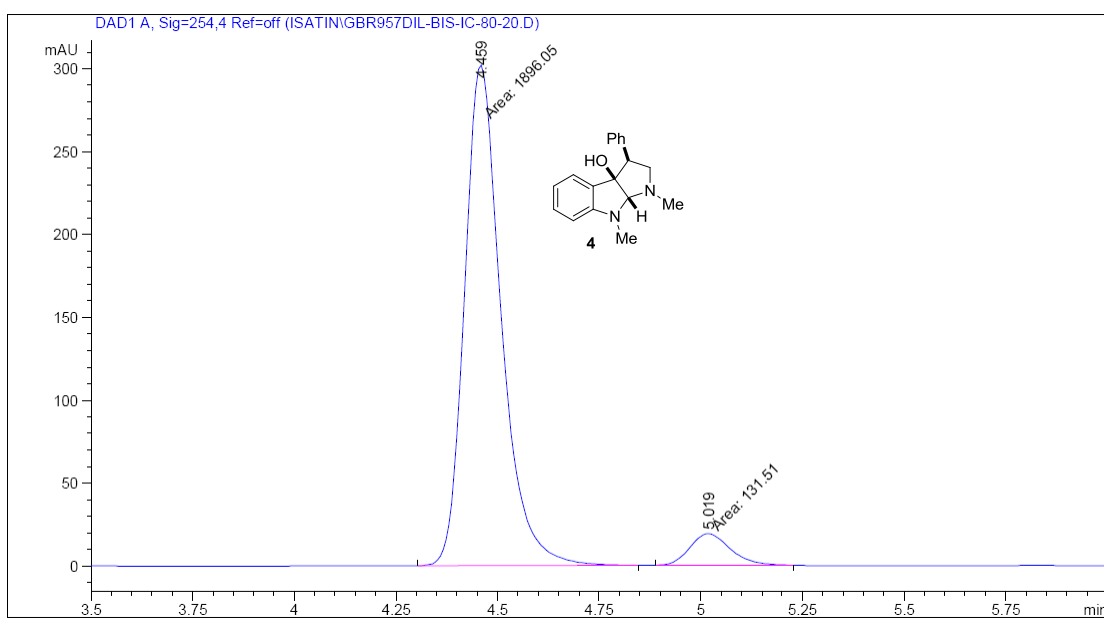

| Peak # | RetTime [min] | Type | Width [min] | Area [mAU*s] | Height [mAU] | Area %  |
|--------|---------------|------|-------------|--------------|--------------|---------|
| 1      | 4.459         | MM   | 0.1045      | 1897.03650   | 302.42856    | 94.5392 |
| 2      | 5.019         | MM   | 0.1031      | 109.57704    | 17.70963     | 5.4608  |
